# Supplementary material for: Social interactions of persons with dementia living in special care units in long-term care: A mixed-methods systematic review
Source: PubMed Central journal article supplement — Dementia (London). 2020 Apr 23;20(3):967–84. doi: 10.1177/1471301220919937 (PMC8044601; doi:10.1177/1471301220919937), 2020-04-23
Supplement: sj-pdf-1-dem-10.1177_1471301220919937.pdf [file sj-pdf-1-dem-10.1177_1471301220919937.pdf]

## **Supplementary material.**

Critical appraisal of the included studies.

Article: Social interactions of persons with dementia living in special care units in long-term care: A mixed-methods systematic review.

January 2019

Table 6: Critical appraisal of quasi-experimental studies

|                                                                                                          | de Boer, Hamers, Zwakhalen, Tan, Beerens & Verbeek, 2017 | de Rooij et al., 2012 | Kok et al., 2018 | Verbeek et al., 2010 | Wolf-Ostermann et al., 2012 |
|----------------------------------------------------------------------------------------------------------|----------------------------------------------------------|-----------------------|------------------|----------------------|-----------------------------|
| Clarity about cause and effect <sup>a</sup>                                                              | Y                                                        | Y                     | Y                | Y                    | Y                           |
| Inclusion criteria for sample clearly defined <sup>b</sup>                                               | Y                                                        | N                     | N                | Y                    | Y                           |
| Control group (present) <sup>a</sup>                                                                     | Y                                                        | Y                     | Y                | Y                    | Y                           |
| Similar participants in comparison <sup>a</sup>                                                          | Y                                                        | Y                     | Y                | Y                    | Y                           |
| Study subject, study setting and intervention in the intervention group described in detail <sup>b</sup> | Y                                                        | N                     | N                | Y                    | N                           |
| Similar treatment in comparison (other than the intervention of interest) <sup>a</sup>                   | Y                                                        | Y                     | Y                | Y                    | Y                           |
| Study subject, study setting and intervention in the control group described in detail <sup>c</sup>      | Y                                                        | N                     | N                | Y                    | N                           |
| Outcomes measured before the intervention was introduced (pre-test) <sup>c</sup>                         | N                                                        | N                     | Y                | N                    | Y                           |
| Outcomes measured after the intervention was introduced (post-test) <sup>c</sup>                         | Y                                                        | Y                     | Y                | Y                    | Y                           |
| Outcomes measured multiple times after the intervention was introduced (longitudinal) <sup>c</sup>       | Y                                                        | Y                     | Y                | Y                    | Y                           |
| Follow-up differences described and analysed <sup>d</sup>                                                | Y                                                        | Y                     | Y                | Y                    | Y                           |
| Outcomes measured same for all groups <sup>a</sup>                                                       | Y                                                        | Y                     | Y                | Y                    | Y                           |
| Outcomes measured reliable <sup>a</sup>                                                                  | Y                                                        | Y                     | Y                | Y                    | Y                           |
| Confounding factors identified <sup>d</sup>                                                              | Y                                                        | Y                     | Y                | Y                    | Y                           |
| Strategies to deal with confounding factors stated <sup>d</sup>                                          | Y                                                        | Y                     | Y                | Y                    | Y                           |
| Appropriate statistical analysis <sup>a</sup>                                                            | Y                                                        | Y                     | Y                | Y                    | Y                           |

N = No; Y = Yes; U = Unclear, NA= Not Applicable

<sup>a</sup> Item of the Joanna Briggs Institute Checklist for quasi-experimental studies

<sup>b</sup> Item of the Joanna Briggs Institute Checklist for analytical cross-sectional studies considered important to assess the study quality for this specific purpose

<sup>c</sup> Item formulated by the authors because this aspect is considered important to assess the study quality for this specific purpose

<sup>d</sup> Item of the Joanna Briggs Institute Checklist for cohort studies considered important to assess the study quality for this specific purpose

Critical appraisal is based on the Critical Appraisal Tools of the Joanna Briggs Institute (Aromataris, Munn, 2017) with adaptations made for the appraisal of studies focusing on special care units; all adaptations are indicated in the tools.

Table 7: Critical appraisal of cohort studies

|                                                                                                          | van der Zon et al., 2018 |
|----------------------------------------------------------------------------------------------------------|--------------------------|
| Inclusion criteria for sample clearly defined <sup>a</sup>                                               | Y                        |
| Similar groups recruited from the same population <sup>b</sup>                                           | N                        |
| Control group (present) <sup>c</sup>                                                                     | N                        |
| Study subject, study setting and intervention in the intervention group described in detail <sup>a</sup> | Y                        |
| Study subject, study setting and intervention in the control group described in detail <sup>d</sup>      | NA                       |
| Exposure measured similarly <sup>b</sup>                                                                 | NA                       |
| Exposure measured valid and reliable <sup>b</sup>                                                        | Y                        |
| Confounding factors identified <sup>b</sup>                                                              | Y                        |
| Strategies to deal with confounding factors stated <sup>b</sup>                                          | Y                        |
| Groups free of the outcome at the start of study <sup>e</sup>                                            | NA                       |
| Outcomes measured in a valid and reliable way <sup>b</sup>                                               | Y                        |
| Follow-up over a sufficient time period <sup>b</sup>                                                     | Y                        |
| Follow-up complete or incomplete described and explored <sup>b</sup>                                     | Y                        |
| Strategies to address incomplete follow up utilized <sup>b</sup>                                         | N                        |
| Appropriate statistical analysis <sup>b</sup>                                                            | Y                        |

N = No; Y = Yes; U = Unclear; NA = Not Applicable

<sup>a</sup> Item of the Joanna Briggs Institute Checklist for analytical cross-sectional studies considered important to assess the study quality for this specific purpose

<sup>b</sup> Item of the Joanna Briggs Institute Checklist for cohort studies

<sup>c</sup> Item of the Joanna Briggs Institute Checklist for quasi-experimental studies considered important to assess the study quality for this specific purpose

<sup>d</sup> Item formulated by the authors because this aspect is considered important to assess the study quality for this specific purpose

<sup>e</sup> Item not scored because participants cannot be free of the quality of life at any time

Critical appraisal is based on the Critical Appraisal Tools of the Joanna Briggs Institute (Aromataris, Munn, 2017) with adaptations made for the appraisal of studies focusing on special care units; all adaptations are indicated in the tools.

Table 8: Critical appraisal analytical cross-sectional studies

|                                                                                                          | Abbott & Pachucki, 2017 | Abbott, Sefcik & van Haitsma, 2017 | Abrahamson et al., 2012 | de Boer, Hamers, Zwakhalen, Tan & Verbeek, 2017 | Morgan Brown et al., 2013 | Weyerer et al., 2010 | Wood et al., 2005 |
|----------------------------------------------------------------------------------------------------------|-------------------------|------------------------------------|-------------------------|-------------------------------------------------|---------------------------|----------------------|-------------------|
| Inclusion criteria for sample clearly defined                                                            | Y                       | Y                                  | Y                       | Y                                               | N                         | Y                    | Y                 |
| Control group (present) <sup>a</sup>                                                                     | N                       | Y                                  | Y                       | Y                                               | Y                         | Y                    | N                 |
| Study subject, study setting and intervention in the intervention group described in detail <sup>a</sup> | N                       | N                                  | N                       | Y                                               | Y                         | N                    | Y                 |
| Study subject, study setting and intervention in the control group described in detail <sup>b</sup>      | NA                      | N                                  | N                       | Y                                               | Y                         | N                    | NA                |
| Exposure measured valid and reliable                                                                     | Y                       | Y                                  | Y                       | Y                                               | Y                         | Y                    | Y                 |
| Objective, standard criteria for measurement of the condition                                            | Y                       | Y                                  | Y                       | Y                                               | Y                         | Y                    | Y                 |
| Confounding factors identified                                                                           | N                       | N                                  | Y                       | Y                                               | U                         | Y                    | N                 |
| Strategies to deal with confounding factors stated                                                       | N                       | N                                  | Y                       | Y                                               | N                         | Y                    | N                 |
| Outcomes measured in a valid and reliable way                                                            | Y                       | N                                  | Y                       | Y                                               | U                         | Y                    | U                 |
| Appropriate statistical analysis                                                                         | U                       | Y                                  | Y                       | Y                                               | Y                         | Y                    | U                 |

N = No; Y = Yes; U = Unclear; NA = Not Applicable

<sup>a</sup> Item of the Joanna Briggs Institute Checklist for quasi-experimental studies considered important to assess the study quality for this specific purpose

<sup>b</sup> Item reformulated by the authors because this aspect is considered important to assess the study quality for this specific purpose

<sup>c</sup> Item formulated by the authors because this aspect is considered important to assess the study quality for this specific purpose

Critical appraisal is based on the Critical Appraisal Tools of the Joanna Briggs Institute (Aromataris, Munn, 2017) with adaptations made for the appraisal of studies focusing on special care units; all adaptations are indicated in the tools.

Table 9: Critical appraisal qualitative studies

|                                                                         | Aasgaard et al., 2017 | Campo & Chaudhury, 2012 | Doyle et al., 2012 | Moore & Verhoef, 1999 | Moore, 1999 |
|-------------------------------------------------------------------------|-----------------------|-------------------------|--------------------|-----------------------|-------------|
| Congruity between philosophical perspective and research methodology    | Y                     | Y                       | Y                  | Y                     | Y           |
| Congruity between research methodology and research question/objectives | Y                     | Y                       | Y                  | Y                     | Y           |
| Congruity between research methodology and data collection methods      | Y                     | Y                       | U                  | N                     | N           |
| Congruity between research methodology and data analysis methods        | U                     | Y                       | Y                  | Y                     | Y           |
| Congruity between research methodology and interpretation of results    | N                     | Y                       | Y                  | N                     | N           |
| Statement locating researchers culturally and theoretically             | N                     | Y                       | Y                  | N                     | N           |
| Influence of researcher on research (and vice versa) addressed          | N                     | N                       | N                  | N                     | Y           |
| Participants and voices adequately represented                          | Y                     | Y                       | Y                  | U                     | Y           |
| Research ethical according to current criteria/ethical approval         | Y                     | U                       | U                  | U                     | U           |
| Conclusions drawn from analysis/interpretation of data                  | Y                     | Y                       | Y                  | Y                     | Y           |

N = No; Y = Yes; U = Unclear

Critical appraisal is based on the Critical Appraisal Tools of the Joanna Briggs Institute (Aromataris, Munn, 2017) with adaption made for the appraisal of studies focusing on special care units; all adaption are indicated in the tools.
