# Supplementary material for: Social interactions of persons with dementia living in special care units in long-term care: A mixed-methods systematic review
Source: PubMed Central journal article supplement — Dementia (London). 2020 Apr 23;20(3):967–84. doi: 10.1177/1471301220919937 (PMC8044601; doi:10.1177/1471301220919937), 2020-04-23
Supplement: sj-pdf-2-dem-10.1177_1471301220919937.pdf [file sj-pdf-2-dem-10.1177_1471301220919937.pdf]

## **Supplementary material.**

Characteristics and results of the included studies.

Article: Social interactions of persons with dementia living in special care units in long-term care: A mixed-methods systematic review.

January 2019

Table 3: Characteristics and results of included qualitative studies

| Reference and country                        | Aim                                                                                                                                                | Design                          | Setting                                            | Data collection methods                        | Participants                                                                                                                                                                                              | Data analysis methods                                                         | Results (themes, categories)                                                                                                                                                                                                                                                                                                             |
|----------------------------------------------|----------------------------------------------------------------------------------------------------------------------------------------------------|---------------------------------|----------------------------------------------------|------------------------------------------------|-----------------------------------------------------------------------------------------------------------------------------------------------------------------------------------------------------------|-------------------------------------------------------------------------------|------------------------------------------------------------------------------------------------------------------------------------------------------------------------------------------------------------------------------------------------------------------------------------------------------------------------------------------|
| Aasgaard, Landmark, Öresland, 2017<br>Norway | To explore healthcare professionals' experiences in sustaining relationships and enhancing social community in common spaces in special care units | Qualitative, descriptive design | 1 special care unit (no further information given) | Focus-groups                                   | 15 healthcare professionals                                                                                                                                                                               | Qualitative content analysis (Graneheim, Lundmann, 2004)                      | Themes: dilemmas between <ul style="list-style-type: none"> <li>• knowing versus not knowing each other</li> <li>• safety versus unsafety</li> <li>• presence versus absence</li> </ul>                                                                                                                                                  |
| Campo, Chaudhury, 2012,<br>Canada            | To explore key elements of physical and social environment that act as facilitators or barriers for social interaction in special care units       | Ethnographic study              | 2 special care units (26/18 residents)             | In-depth interviews, observations of residents | 5 staff members, residents, n=not given                                                                                                                                                                   | Thematic analysis (Charmaz, 2006)                                             | Key themes of social and physical factors supporting informal social interaction: <ul style="list-style-type: none"> <li>• philosophy of care and role of care staff</li> <li>• resident group size</li> <li>• homelike character and ambiance</li> <li>• nursing station location</li> <li>• adequate seating and sightlines</li> </ul> |
| Doyle et al., 2012<br>USA                    | To explore how people with dementia integrate into the social environment and social structures of special care units                              | Ethnographic study              | 1 special care unit (31 residents)                 | Interviews and observations                    | 12 residents for interviews, number of staff members for interview not given, 31 residents for observations ( <u>Mean age=82.4, SD=7.6, 67.7% female, mean MMSE=14.7, SD=6.7, mean FAST=5.0, SD=1.0</u> ) | Social maps, individual and team coding with ongoing reviewing and discussion | Central pattern = nested social groups: factors influencing nested social group formation: physical and organizational environment, and continuity of nested social groups in different environmental contexts                                                                                                                           |

Table 3: Characteristics and results of included qualitative studies (continued)

| Reference and country                       | Aim                                                                                                       | Design     | Setting                               | Data collection methods                                                        | Participants                                                                                                                                                                      | Data analysis methods                        | Results (themes, categories)                                                                                                                                                                                                                        |
|---------------------------------------------|-----------------------------------------------------------------------------------------------------------|------------|---------------------------------------|--------------------------------------------------------------------------------|-----------------------------------------------------------------------------------------------------------------------------------------------------------------------------------|----------------------------------------------|-----------------------------------------------------------------------------------------------------------------------------------------------------------------------------------------------------------------------------------------------------|
| Moore, 1999<br>USA                          | To describe the social life found in the dining areas of a special care unit                              | Case study | 1 special care unit<br>(24 residents) | Nonparticipant observations, field notes, behavioural mapping                  | 24 residents                                                                                                                                                                      | Process of coding and memoing (Glaser, 1978) | Themes: <ul style="list-style-type: none"> <li>the mechanisms of dining</li> <li>the freedom of free time</li> <li>negotiating between talk and task</li> <li>diagnosis of congruence in the dining area</li> <li>reasons for dissonance</li> </ul> |
| Moore, Verhoef, 1999<br>USA/the Netherlands | To evaluate social interaction understood as a global dimension of quality of life in a special care unit | Case study | 1 special care unit<br>(24 residents) | Nonparticipant observations, field notes, behavioural mapping, numerous scales | 24 residents<br><u>(Mean age=14.3, 91.7% female, mean MMSE=14.3, Katz Index of Activities of Daily living=most residents need assistance with bathing and one other function)</u> | Grounded theory                              | Diagnosis: most of the residents' time in public spaces is spent in the dining area, not interacting; most time is spent in solo activities and sitting<br>Recommendations: create congruent social spaces, homelike staff activities               |

Table 4: Characteristics and results of included quantitative studies

| Reference and country              | Aim                                                                                                                                            | Design                | Setting                                                                              | Sample size and characteristics                                                                                                                                                                                                                                                                                                                                                                                                          | Outcomes and measures                                                                                                                                                                                                                               | Time points                                                    | Relevant results                                                                                                                                                                                                                                                                                                                                                                     |
|------------------------------------|------------------------------------------------------------------------------------------------------------------------------------------------|-----------------------|--------------------------------------------------------------------------------------|------------------------------------------------------------------------------------------------------------------------------------------------------------------------------------------------------------------------------------------------------------------------------------------------------------------------------------------------------------------------------------------------------------------------------------------|-----------------------------------------------------------------------------------------------------------------------------------------------------------------------------------------------------------------------------------------------------|----------------------------------------------------------------|--------------------------------------------------------------------------------------------------------------------------------------------------------------------------------------------------------------------------------------------------------------------------------------------------------------------------------------------------------------------------------------|
| Abbott, Pachucki, 2017 USA         | To examine associations between social network characteristics, cognitive function, and quality of life among residents of a special care unit | Cross-sectional study | 1 special care unit for 16 residents                                                 | n=37 residents with dementia<br>Residents of the special care unit in March 2011: n=10 (Mean age=89.2 years, SD=5.0, 80% female, <u>mean MMSE=18.7, SD=5.1</u> )<br>Residents of the special care unit in March 2012: n=10 (Mean age=90.6 years, SD=4.6, 90% female, <u>mean MMSE=19.8, SD=4.8</u> )<br>Residents of the special care unit in March 2013: n=17 (Mean age=88.5 years, SD=7.3, 88% female, <u>mean MMSE 16.9, SD=6.5</u> ) | quality of life: one general question with a Likert-scale response format (1-5)<br><br>Social networks: observations regarding size, frequency of nominations to others and from others (indegree, outdegree), reciprocated nominations, centrality | 3 time points with different samples (1 time point per sample) | Approximately half of the ties sent or received were reciprocated<br>No significant positive association between quality of life and social network characteristics<br>Residents tended to be tied to residents of higher quality of life status (43.3%, n=13 personal networks), opposed to lower (30%, n=9 networks) or same (26.7%, n=8 networks)                                 |
| Abbott, Selfcik, Haitsma, 2017 USA | To measure social interactions among residents with dementia of special care units and traditional nursing homes                               | Cross-sectional study | 1 special care unit for 16 residents, 1 traditional nursing home                     | n=29 residents with dementia, 15 in special care unit (Mean age=88 years, SD=7.3, <u>mean functional limitations=17.2, SD=8.5</u> )<br>14 in traditional nursing home (Mean age=87 years, SD=9.7, <u>mean functional limitations =23.6, 4.4</u> )                                                                                                                                                                                        | Social interaction: observations regarding type, location, length, context, affect during interaction                                                                                                                                               | One time point                                                 | Significantly more interactions in the afternoon (M=22.1 (SD=4.3) vs 11.3 (SD=8.7), p=0.02), interactions dedicated to re-direction in the morning M=7.5 (SD=7.1) vs. 1.5 (SD=3.4), p=0.01), interactions in the dining room in the morning (M=7.5 (SD=7.1) vs. 1.5 (SD=3.4), p=0.01) and in the afternoon (M=6.5 (SD=10.7) vs. 0.1 (SD=0.3), p=0.04) in special care unit residents |
| Abrahamson et al., 2012 USA        | To assess the influence of cognitive impairment and special care unit placement on quality of life                                             | Cross-sectional study | 118 special care units (no further information given), 270 traditional nursing homes | n=13,107 residents with mild and moderate dementia<br>665 in special care units (Mean age=84.5 years, SD=9.1, 71.9% female, <u>mean CPS=3.1, SD=0.5, mean ADL=13.1, SD=7.1</u> )<br>12, 442 in traditional nursing homes (Mean age=83.0 years, SD=11.9, 69.0% female, <u>mean CPS=1.9, SD=1.2, mean ADL=12.9, SD=7.8</u> )                                                                                                               | quality of life: 2007 Minnesota Resident Satisfaction Survey <sup>a</sup>                                                                                                                                                                           | One time point                                                 | No significant association between special care unit residence and relationships                                                                                                                                                                                                                                                                                                     |

Table 4: Characteristics and results of included quantitative studies (continued)

| Reference and country                                                       | Aim                                                                                                                                                           | Design                   | Setting                                                                                                                                                                       | Sample size and characteristics                                                                                                                                                                                                                                                                                                                                                                                                                                                                | Outcomes and measures                                                                                      | Time points                 | Relevant results                                                                                                                                                                                                                                                                             |
|-----------------------------------------------------------------------------|---------------------------------------------------------------------------------------------------------------------------------------------------------------|--------------------------|-------------------------------------------------------------------------------------------------------------------------------------------------------------------------------|------------------------------------------------------------------------------------------------------------------------------------------------------------------------------------------------------------------------------------------------------------------------------------------------------------------------------------------------------------------------------------------------------------------------------------------------------------------------------------------------|------------------------------------------------------------------------------------------------------------|-----------------------------|----------------------------------------------------------------------------------------------------------------------------------------------------------------------------------------------------------------------------------------------------------------------------------------------|
| de Boer, Hamers, Zwakhalen, Tan, Beerens & Verbeek, 2017<br>The Netherlands | To investigate social interactions and engagement in activities of residents of green care farms, small-scale living facilities and traditional nursing homes | quasi-experimental study | 5 green care farms (~8 residents in small-scale living facilities on a farm), 9 small-scale living facilities (8 residents), 4 traditional nursing homes (>20 residents/ward) | n=115 residents with dementia<br>34 in green care farms (Mean age=82.1 years, SD=8.5, 68% female, <a href="#">mean S-MMSE=8, SD=6.7, mean Barthel Index=9, SD=5.7</a> )<br>52 in small-scale living facilities (Mean age=85.5 years, SD=6.8, 87% female, <a href="#">mean S-MMSE=9, SD=6.9, mean Barthel Index=10, SD=5.7</a> )<br>29 in traditional nursing homes (Mean age=82.6 years, SD=8.3, 62% female, <a href="#">mean S-MMSE=8, SD=7, mean Barthel Index=9, SD=6.6</a> )               | Social engagement and engagement in activities: MEDLO-tool <sup>b</sup> (observations)                     | Baseline and after 6 months | Significantly more active engagement (ES=0.9, p=0.014) and more social interaction (ES=1.1, p=0.010) in green care farm residents than in traditional nursing homes residents<br>No significant differences between green care farm residents and residents of small-scale living facilities |
| de Boer, Hamers, Zwakhalen, Tan & Verbeek, 2017<br>The Netherlands          | To compare quality of life and quality of care in green care farms, small-scale and traditional nursing homes                                                 | Cross-sectional study    | 5 green care farms (~8 residents in small-scale living facilities on a farm), 9 small-scale living facilities (8 residents), 4 traditional nursing homes (>20 residents/ward) | n=115 residents with dementia<br>34 in green care farms (Mean age=82.1 years, SD=8.5, 68% female, <a href="#">mean S-MMSE=8.1, SD=6.7, mean Barthel Index=9.1, SD=5.7</a> )<br>52 in small-scale living facilities (Mean age=85.5 years, SD=6.8, 87% female, <a href="#">mean S-MMSE=10.3, SD=5.7, mean Barthel Index=9.1, SD=6.9</a> )<br>29 in traditional nursing homes (Mean age=82.6 years, SD=8.3, 62% female, <a href="#">mean S-MMSE=9.4, SD=6.6, mean Barthel Index=7.5, SD=7.0</a> ) | quality of life: QOL-AD <sup>c</sup> and QUALIDEM <sup>d</sup><br><br>Social engagement: RISE <sup>e</sup> | One time point              | Significantly higher score in the QUALIDEM domain social relations (ES=0.8, p=0.042) in green care farm residents than in traditional nursing home residents<br>No differences between green care farms and small-scale facilities                                                           |

Table 4: Characteristics and results of included quantitative studies (continued)

| Reference and country                    | Aim                                                                                                                                                 | Design                   | Setting                                                                                                                                 | Sample size and characteristics                                                                                                                                                                                                                                                                                                                                                                                                                                                                                                                                                                                                                                                                                                                      | Outcomes and measures                                                              | Time points                     | Relevant results                                                                                                                                                                      |
|------------------------------------------|-----------------------------------------------------------------------------------------------------------------------------------------------------|--------------------------|-----------------------------------------------------------------------------------------------------------------------------------------|------------------------------------------------------------------------------------------------------------------------------------------------------------------------------------------------------------------------------------------------------------------------------------------------------------------------------------------------------------------------------------------------------------------------------------------------------------------------------------------------------------------------------------------------------------------------------------------------------------------------------------------------------------------------------------------------------------------------------------------------------|------------------------------------------------------------------------------------|---------------------------------|---------------------------------------------------------------------------------------------------------------------------------------------------------------------------------------|
| de Rooij et al., 2012<br>The Netherlands | To examine effects of small-scale living on residents with dementia compared with traditional nursing homes                                         | Prospective cohort study | 5 long-term care settings with 12 small-scale living units (no further information given) and 4 traditional nursing homes               | n=179 residents with dementia (81 in traditional nursing homes, 98 in small-scale living facilities) 51 in small-scale living facilities in the Netherlands (Mean age=84.5 years, SD=5.9, 80% female, <u>mean S-MMSE=7.6, SD=6.3, mean Barthel Index=8.6, SD=5.6</u> ) 51 in traditional nursing homes in the Netherlands (Mean age=84.0 years, SD=5.1, 67% female, <u>mean S-MMSE=5.0, SD=5.6, mean Barthel Index=5.3, SD=4.9</u> ) 47 in small-scale living facilities in Belgium (Mean age=84.5 years, SD=7.0, 89% female, <u>mean S-MMSE=6.1, SD=5.6, mean Barthel Index=8.6, SD=4.7</u> ) 30 in traditional nursing homes in Belgium (Mean age=89.1 years, SD=5.7, 83% female, <u>mean S-MMSE=8.1, SD=8.1, mean Barthel Index=5.9, SD=5.6</u> ) | quality of life: QUALIDEM <sup>d</sup><br><br>Social engagement: RISE <sup>c</sup> | Baseline, after 6 and 12 months | Significantly higher means aggregated over time in special care units in the Netherlands in the domain social relations (M=8.3, p<0.001), and social engagement (RISE, M=2.4, p<0.01) |
| Kok et al., 2018<br>The Netherlands      | To examine the effects of a small-scale special care unit compared to a large-scale special care unit on quality of life of residents with dementia | Quasi-experimental study | 2 large-scale special care units (20-30 residents/ward), residents of one of these moved to small-scale facilities (7-8 residents/ward) | n=145 residents with dementia 77 in small-scale special care units (Mean age=83.4 years, SD=6.1, 69% female, <u>mean Global Cognitive Function=8.7, SD=6.5</u> ) 68 in large-scale special care units (Mean age=82.8 years, SD=7.6, 72% female, <u>mean Global Cognitive Function=8.4, SD=6.5</u> )                                                                                                                                                                                                                                                                                                                                                                                                                                                  | quality of life: QUALIDEM <sup>d</sup>                                             | Baseline, after 3 and 6 months  | No significant differences and only small effects between small-scale special care units and large-scale special care units in all QUALIDEM subscales                                 |

Table 4: Characteristics and results of included quantitative studies (continued)

| Reference and country                       | Aim                                                                                                                                                                                | Design                                                 | Setting                                                                                                                                                                      | Sample size and characteristics                                                                                                                                                                             | Outcomes and measures                                                               | Time points                                                                                                                                                       | Relevant results                                                                                                                                                                                             |
|---------------------------------------------|------------------------------------------------------------------------------------------------------------------------------------------------------------------------------------|--------------------------------------------------------|------------------------------------------------------------------------------------------------------------------------------------------------------------------------------|-------------------------------------------------------------------------------------------------------------------------------------------------------------------------------------------------------------|-------------------------------------------------------------------------------------|-------------------------------------------------------------------------------------------------------------------------------------------------------------------|--------------------------------------------------------------------------------------------------------------------------------------------------------------------------------------------------------------|
| Morgan-Brown et al., 2013<br>Ireland        | To compare social engagement and interactive occupation of residents in two Irish nursing home units for people with dementia before and after implementing household environments | Cross-sectional study                                  | 2 special care units with household environments (18 residents), control group: the same special care units before implementing the household environments (17/18 residents) | n=71 residents with dementia<br>35 in the traditional model unit<br>36 in the household model unit                                                                                                          | Social engagement and interactive occupation: observations using ATOSE <sup>f</sup> | T1 - residents before implementing household environment<br>T2 - other residents after implementation of household environment (time between T1 and T2 not given) | Significant higher social engagement in the household model units (M=57.9 years, SD=22.1) than in traditional model units (M=25.8 years, SD=12.5; p<0.001)                                                   |
| van der Zon et al., 2018<br>The Netherlands | To assess the course of quality of life over 2 years in residents of dementia special care units                                                                                   | Observational longitudinal study without control group | 9 nursing homes with 14 dementia special care units (no control group, no further information given)                                                                         | n=290 residents with dementia<br>(Mean age=83.2 years, SD=7.1, 76.2% female, <a href="#">mean MMSE=7.1, SD=6.5, mean ADL – 4 Items of Section G InterRAI Long-term Care Facility Version=14.3, SD=7.8</a> ) | quality of life: QUALIDEM <sup>d</sup>                                              | Baseline, after 6, 12, 18 and 24 months                                                                                                                           | Significant increase/year in the subscales care relationship (0.5 points, p=0.002), social isolation (0.3 points, p=0.004), Significant decline/year in the subscale social relations (-1.1 points, p<0.001) |

Table 4: Characteristics and results of included quantitative studies (continued)

| Reference and country                   | Aim                                                                                                                                                             | Design                   | Setting                                                                                                                                                                                   | Sample size and characteristics                                                                                                                                                                                                                                                                                                                                             | Outcomes and measures                                                                                                                                                 | Time points                     | Relevant results                                                                                                                                                                                                                                                                                                                                                                                                                                                                                                   |
|-----------------------------------------|-----------------------------------------------------------------------------------------------------------------------------------------------------------------|--------------------------|-------------------------------------------------------------------------------------------------------------------------------------------------------------------------------------------|-----------------------------------------------------------------------------------------------------------------------------------------------------------------------------------------------------------------------------------------------------------------------------------------------------------------------------------------------------------------------------|-----------------------------------------------------------------------------------------------------------------------------------------------------------------------|---------------------------------|--------------------------------------------------------------------------------------------------------------------------------------------------------------------------------------------------------------------------------------------------------------------------------------------------------------------------------------------------------------------------------------------------------------------------------------------------------------------------------------------------------------------|
| Verbeek et al., 2010<br>The Netherlands | To investigate the effects of small-scale living compared with regular care in nursing homes on residents' quality of life                                      | Prospective cohort study | 28 small-scale living facilities (<9 residents per house, a joint household, small fixed team of caring staff), 21 regular wards (nursing home wards with at least 20 residents per ward) | n=259 residents with dementia<br>124 in small-scale living facilities (Mean age=82.4 years, SD=7.9, 80% female, <u>mean MMSE=11.1, SD=7.0, mean Activities of Daily Living-Hierarchy Scale=3.1, SD=1.7</u> )<br>135 in regular wards (Mean age=83.1 years, SD=6.5, 70% female, <u>mean MMSE=10.5, SD=6.6, mean Activities of Daily Living-Hierarchy Scale=3.3, SD=1.4</u> ) | quality of life: QUALIDEM <sup>d</sup>                                                                                                                                | Baseline, after 6 and 12 months | No significant differences for all subscales and the total score of QUALIDEM for group by time analysis                                                                                                                                                                                                                                                                                                                                                                                                            |
| Weyerer et al., 2010<br>Germany         | To compare quality of life and quality of care in special dementia care and traditional integrative dementia care                                               | Cross-sectional study    | 28 special care units (no further information given), 11 traditional nursing homes                                                                                                        | n=1167 residents with dementia<br>594 in special care units (Mean age=84.4 years, SD=7.7, 84.0% female, <u>median Dementia Screening Scale=11, median Barthel Index=30</u> )<br>573 in traditional nursing homes (Mean age=84.2 years, SD=8.5, 78.9% female, <u>median Dementia Screening Scale=9, median Barthel Index=25</u> )                                            | quality of life: Social contacts (resident to resident, resident to nursing staff, visits by family and friends) and the Modified apparent emotion scale <sup>e</sup> | One time point                  | Significantly more social contact with staff (OR=0.6, 95% CI 0.4-0.9, p<0.05)                                                                                                                                                                                                                                                                                                                                                                                                                                      |
| Wood et al., 2005                       | To characterise general behaviour patterns of residents' uses of social and physical affordances and to determine the prevalence of certain activity situations | Cross-sectional study    | 1 special care unit (7 residents, dedicated staff for the unit, homelike décor, common area of kitchen, living room, activity space and outdoor area, restraint-free policy)              | n=7 residents with dementia (Mean age=81, 57% female)                                                                                                                                                                                                                                                                                                                       | Activity situations including social affordances: Activity in Context and Time <sup>h</sup> (observations)                                                            | one time point                  | Significant associations among social interactions with staff and daily activities: Television (n=397 observations, G=-0.6, SE=0.2, p=0.047), basic activities of daily living (n=34 observations, G=0.9, SE=0.0, p=0.016)<br>Significant associations among social interactions with others and daily activities: Meal/snack times (n=301 observations, G=-0.8, SE=0.1, p=0.016), activity groups (n=117 observations, G=-0.6, Se=0.2, p=0.031), basic activities of daily living (n=34, G=-0.7, SE=0.3, p=0.031) |



Table 4: Characteristics and results of included quantitative studies (continued)

| Reference and country                  | Aim                                                                                                                                                                                            | Design                   | Setting                                                                                                                                                                                                                                               | Sample size and characteristics                                                                                                                                                                                                                                                                                                | Outcomes and measures     | Time points                     | Relevant results                                                                                                                                                                                                                                                                                                                                                                                                                                 |
|----------------------------------------|------------------------------------------------------------------------------------------------------------------------------------------------------------------------------------------------|--------------------------|-------------------------------------------------------------------------------------------------------------------------------------------------------------------------------------------------------------------------------------------------------|--------------------------------------------------------------------------------------------------------------------------------------------------------------------------------------------------------------------------------------------------------------------------------------------------------------------------------|---------------------------|---------------------------------|--------------------------------------------------------------------------------------------------------------------------------------------------------------------------------------------------------------------------------------------------------------------------------------------------------------------------------------------------------------------------------------------------------------------------------------------------|
| Wolf-Ostermann et al., 2012<br>Germany | To compare resident characteristics of shared-housing arrangements and special care units and to examine the development of psychosocial health status (including quality of life) over 1 year | Prospective cohort study | 89 shared-housing arrangements (small-scale living apartments in normal houses - disconnected from residential facilities and served by community care services), 23 special care units (only for people with dementia, no further information given) | n=56 new residents with dementia<br>34 in shared-housing arrangements (Mean age=83.4 years, SD=8.1, 91.2% female, <u>mean MMSE=14.2, SD=7.6, mean Barthel Index=50.3, SD=25.1</u> )<br>22 in special care units (Mean age=81.2 years, SD=10.4, 54.5% female, <u>mean MMSE=11.9, SD=6.6, mean Barthel Index=53.0, SD=27.1</u> ) | quality of life: QUALIDEM | Baseline, after 6 and 12 months | Significant group difference in the subscale care relationship in the interaction with time (p=0.017) indicating higher scores in residents of shared-housing arrangements<br>No other significant group differences in interaction with time; over the one-year period, improvements in many subscales in shared-housing arrangements and special care unit, with slightly higher improvements in more subscales in shared-housing arrangements |

<sup>a</sup> 2007 Minnesota Resident Satisfaction Survey: domains are comfort, activity, privacy, environment, individuality, autonomy, relationship, good mood; subscales range from 1 to 100, except mood - ranges from 0-9, high scores indicate higher QoL

<sup>b</sup> Maastricht Electronic Daily Living Observation tool (MEDLO-tool): assesses the following aspects 1A) the activity performed by the participant or occurring in his/her vicinity (1B) the engagement in the activity, 1C) the level of physical activity during the activity, 2) the physical environment and 3) the level of social interaction during the activity

<sup>c</sup> Quality of Life - Alzheimer's Disease scale (QoL-AD): 13 items, ranges from 13 to 52, high scores indicate higher QoL

<sup>d</sup> QUALIDEM: subscales are care relationship (range 0-21), positive affect (0-18), negative affect (0-9), restless tense behavior (0-9), positive self-image (0-9), social relations (0-18), social isolation (0-9), feeling at home (0-12) and having something to do (0-9), total score is sometimes calculated, higher scores indicate higher QoL

<sup>e</sup> Revised Index for Social Engagement (RISE): 6 items, ranges from 0 to 6, higher scores indicating higher social engagement

<sup>f</sup> Assessment Tool for Occupation and Social Engagement (ATOSE): categories are "engaged" (interactive occupation, social engagement) and "non-engaged" (eyes closed, non-interactive, self-stimulation and agitation)

<sup>g</sup> Modified apparent emotion scale: the frequency of the following expressions of emotions are assessed: interest, pleasure, anger and anxiety

<sup>h</sup> Activity in Context and Time (ACT): domains are activity situations, physical affordances, social affordances, positive behaviour: gaze, positive behaviour: position and movement, positive behaviour: conversational exchanges, positive behaviour: participation in tasks and activities, problematic behaviours: agitation, behavioural distress, or resistance to care, apparent affect
